# Supplementary material for: Cationic recognition by tert-butylcalix[4]arene-functionalized nanoprobes
Source: Royal Society of Chemistry journal article supplement (doi:10.1039/c0cp02658a), 2011-01-01
Supplement: c0cp02658a.pdf [file c0cp02658a.pdf]

## Supporting Information

# Cationic Recognition by *t*-Butylcalix[4]arene-Functionalized Nanoprobes

Hong Yan<sup>a</sup>, Jin Luo<sup>a</sup>, Hong-Ming Xie<sup>b</sup>, Qiong Su<sup>b</sup>, De-Xun Xie<sup>b</sup>, Jun Yin<sup>a</sup>, Bridgid N. Wanjala<sup>a</sup>, Han Diao,<sup>b</sup> De-Lie An<sup>b</sup>, Chuan-Jian Zhong<sup>a\*</sup>

a) Department of Chemistry, State University of New York at Binghamton, Binghamton, New York 13902, USA;

b) College of Chemistry and Chemical Engineering, Hunan University, Changsha, Hunan, 410082, China

\* To whom correspondence should be addressed: E-mail: cjzhong@binghamton.edu

## 0. Molecular structure of calixarene

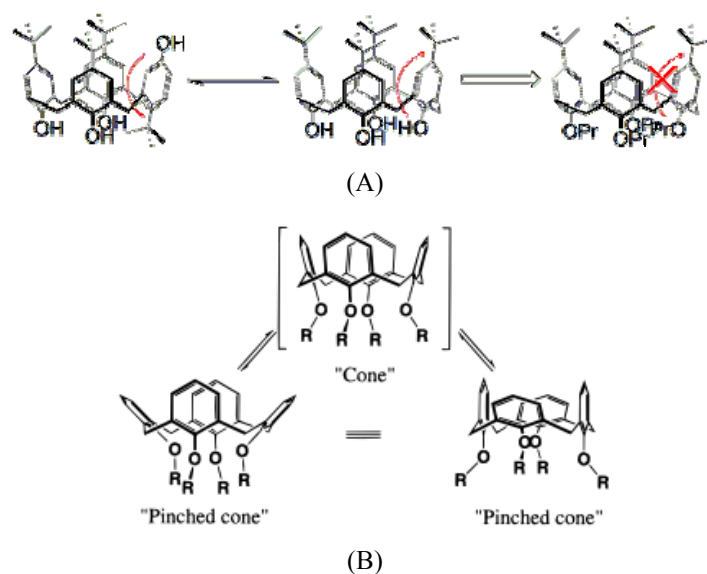

**Scheme S1.** (A) The modes for inversion of the phenyl unit; (B)  $C_{2v}$ - $C_{2v}$  interconversion of tetra-alkoxycalix[4]arene in the cone conformer. (ref. Atsushi Ikeda, Seiji Shinkai. "Novel Cavity Design Using Calix[n]arene Skeletons: Toward Molecular Recognition and Metal Binding". *Chem. Rev.* **1997**, 97, 1713–1734)

## 1. Details of the Ligand Synthesis

(1) *Synthesis of the 9, 10.* 1, 4-dibromobutane (0.55 mL, 4.5mmol) was dissolved in acetone (20 mL), and the solution was heated in the presence of  $K_2CO_3$  (6.2 g, 45mmol) at 50 °C for 30 min. Then, to the above suspension was added a solution of 4-iodophenol (1.0 g, 4.5mmol) in acetone (10 mL) over a period of 4 h by a machine. The reaction mixture was cooled to room temperature and filtered. The filtrate was evaporated in vacuo, and the residue was chromatographed ( $SiO_2$ ; eluent, Hexane/  $CH_2Cl_2$ , 10: 1) to give 0.91 g of **9** (57%) and 0.28 g of **10** (12.5%),

respectively. **9**:  $^1\text{H}$  NMR ( $\text{CDCl}_3$ , 400 MHz)  $\delta$ : 1.93 (m, 2H,  $\text{CH}_2$ ), 2.04 (m, 2H,  $\text{CH}_2$ ), 3.48 (t,  $J = 6.8$  Hz, 2H,  $\text{CH}_2$ ), 3.95 (t,  $J = 6.4$  Hz, 2H,  $\text{CH}_2$ ), 6.66 (d,  $J = 8.8$  Hz, 2H, ArH), 7.55 (d,  $J = 8.4$  Hz, 2H, ArH);  $^{13}\text{C}$  NMR ( $\text{CDCl}_3$ , 100 MHz)  $\delta$ : 27.73 ( $\text{CH}_2$ ), 29.34 ( $\text{CH}_2$ ), 33.36 ( $\text{CH}_2$ ), 66.90 ( $\text{CH}_2$ ), 82.72 (C), 116.82 (CH), 138.18 (CH), 158.68 (C). **10**:  $^1\text{H}$  NMR ( $\text{CDCl}_3$ , 400 MHz)  $\delta$ : 1.95 (t, 4H,  $\text{CH}_2$ ), 3.98 (t, 4H,  $\text{CH}_2$ ), 6.66 (d, 2H, ArH), 7.55 (d, 2H, ArH);  $^{13}\text{C}$  NMR ( $\text{CDCl}_3$ , 100 MHz)  $\delta$ : 25.81 ( $\text{CH}_2$ ), 67.44 ( $\text{CH}_2$ ), 82.63 ( $\text{C}\equiv$ ), 116.83 ( $\text{CH}_2$ ), 138.17 ( $\text{CH}_2$ ), 158.75 (C).

(2) *Synthesis of the 5*. *t*-BCA **4** (2.89 g, 4.45 mmol), *n*-BuBr (12 mL, 132 mmol) were dissolved in DMF (20 mL), and the solution was heated in the presence of  $\text{Ba}(\text{OH})_2 \cdot 8\text{H}_2\text{O}$  (4.2 g, 13.75 mmol) and BaO (3.95 g, 25.8 mmol) at 30 °C for 3 h. After evaporation of the solvent the mixture was taken up in  $\text{CH}_2\text{Cl}_2$  (100 mL) and washed with  $\text{NH}_4\text{Cl}$  ( $2 \times 25$  mL) and brine ( $2 \times 25$  mL). The organic layer was dried with  $\text{MgSO}_4$ , and filtered. The solvent was evaporated in vacuo, and the residue was chromatographed ( $\text{SiO}_2$ ; eluent, Hexane/ $\text{CH}_2\text{Cl}_2$ , 3: 1) to give 3.22 g of **5** (89%) as a white solid. m.p. 136~138 °C;  $^1\text{H}$  NMR (400 MHz,  $\text{CDCl}_3$ )  $\delta$ : 0.82 (s, 18H,  $\text{CH}_3$ ), 0.99 (t,  $J = 7.6$  Hz, 6H,  $\text{CH}_3$ ), 1.04 (t,  $J = 7.2$  Hz, 3H,  $\text{CH}_3$ ), 1.32 (s, 18H,  $\text{CH}_3$ ), 1.40 (m, 2H,  $\text{CH}_2$ ), 1.56 (m, 4H,  $\text{CH}_2$ ), 1.83 (m, 2H,  $\text{CH}_2$ ), 1.95 (m, 2H,  $\text{CH}_2$ ), 2.29 (m, 2H,  $\text{CH}_2$ ), 3.20 (m, 4H,  $\text{ArCH}_2\text{Ar}$ ), 3.79 (m, 4H,  $\text{CH}_2$ ), 3.90 (t,  $J = 8.4$  Hz, 2H,  $\text{CH}_2$ ), 4.35 (m, 4H,  $\text{ArCH}_2\text{Ar}$ ), 5.67 (s, 1H,  $-\text{OH}$ ), 6.51 (m, 4H, ArH), 7.04 (s, 2H, ArH), 7.13 (s, 2H, ArH);  $^{13}\text{C}$  NMR (100 MHz,  $\text{CDCl}_3$ )  $\delta$ : 14.06 ( $\text{CH}_3$ ), 19.58 ( $\text{CH}_3$ ), 31.04 ( $\text{CH}_3$ ), 31.09 ( $\text{CH}_2$ ), 31.27 ( $\text{CH}_2$ ), 31.67 ( $\text{CH}_3$ ), 31.74 ( $\text{CH}_3$ ), 32.40 ( $\text{CH}_2$ ), 33.62 (C), 33.81 (C), 34.10 (C), 74.67 ( $\text{CH}_2$ ), 76.00 ( $\text{CH}_2$ ), 124.62 (CH), 124.70 (CH), 124.94 (CH), 125.55 (CH), 129.36 (C), 131.86 (C), 132.23 (C), 135.99 (C), 141.30 (C), 144.96 (C), 145.42 (C), 150.65 (C), 151.74 (C), 153.98 (C); APCI-MS  $m/z$ : 1197.0 ( $\text{M}^+$ , 100).

(3) *Synthesis of the 6*. *t*-BCA **5** (1.8 g, 2.35 mmol) was treated with oil-dispersed NaH (560 mg, 23.2 mmol) in DMF (20 mL) for 1.5 hr at 50 °C, and then **9** (1.0 g, 2.82 mmol) which was dissolved in DMF was added. The reaction mixture was refluxed for 20 h. Excess NaH was decomposed with methanol. The mixture was diluted with water (200 mL) and extracted with  $\text{CH}_2\text{Cl}_2$  ( $3 \times 20$  mL). The organic layer was washed with  $\text{NH}_4\text{Cl}$  ( $2 \times 25$  mL) and brine ( $2 \times 25$  mL), dried with  $\text{MgSO}_4$ , and filtered. The solvent was evaporated in vacuo, and the residue was chromatographed ( $\text{SiO}_2$ ; eluent, Hexane/ $\text{CH}_2\text{Cl}_2$ , 3: 1) to give 0.66 g of **6** (88%) as a white solid. m.p. 106~108 °C;  $^1\text{H}$  NMR (400 MHz,  $\text{CDCl}_3$ )  $\delta$ : 0.98 (t,  $J = 7.6$  Hz, 9H,  $\text{CH}_3$ ), 1.06 (s, 18H,  $\text{CH}_3$ ), 1.09 (s, 18H,  $\text{CH}_3$ ), 1.43 (m, 6H,  $\text{CH}_2$ ), 1.93 (m, 2H,  $\text{CH}_2$ ), 2.00 (m, 6H,  $\text{CH}_2$ ), 2.18 (m, 2H,  $\text{CH}_2$ ), 3.12 (m, 4H,  $\text{ArCH}_2\text{Ar}$ ), 3.84 (m, 6H,  $\text{CH}_2$ ), 3.94 (t,  $J = 7.6$  Hz, 2H,  $\text{CH}_2$ ), 4.00 (t,  $J = 6.4$  Hz, 2H,  $\text{CH}_2$ ), 4.40 (d,  $J = 8.4$  Hz, 4H,  $\text{ArCH}_2\text{Ar}$ ), 6.69 (d,  $J = 8.8$  Hz, 2H, ArH), 6.75 (s, 4H, ArH), 6.80 (s, 4H, ArH), 7.55 (d,  $J = 8.8$  Hz, 2H, ArH);  $^{13}\text{C}$  NMR (100 MHz,  $\text{CDCl}_3$ )  $\delta$ : 14.20 ( $\text{CH}_3$ ), 14.26 ( $\text{CH}_3$ ), 19.35 ( $\text{CH}_3$ ), 19.40 ( $\text{CH}_3$ ), 25.99 ( $\text{CH}_2$ ), 26.83 ( $\text{CH}_2$ ), 31.07 ( $\text{CH}_2$ ), 31.43 ( $\text{CH}_3$ ), 31.47 ( $\text{CH}_3$ ), 32.38 ( $\text{CH}_2$ ), 33.78 (C), 33.81 (C), 68.03 ( $\text{CH}_2$ ), 74.70 ( $\text{CH}_2$ ), 75.11 ( $\text{CH}_2$ ), 75.15 ( $\text{CH}_2$ ), 82.49 (C), 116.84 (CH), 124.79 (CH), 124.89 (CH), 124.97 (CH), 133.58 (C), 133.73 (C), 133.92 (C), 138.15 (CH), 144.18 (C), 144.38 (C), 153.61 (C), 153.75 (C), 158.95 (C).

(4) *Synthesis of the 7*. A suspension of *t*-BCA **4** (0.4 g, 0.62 mmol),  $\text{K}_2\text{CO}_3$  (0.33 g, 2.39 mmol), and **9** (0.53 g, 1.49 mmol) in  $\text{CH}_3\text{CN}$  (40 mL) was refluxed for 16 h. After evaporation of the solvent the mixture was taken up in  $\text{CH}_2\text{Cl}_2$  (100 mL) and washed with  $\text{NH}_4\text{Cl}$  ( $2 \times 25$  mL) and brine ( $2 \times 25$  mL). The organic layer was dried with  $\text{MgSO}_4$ , and filtered. The solvent was evaporated in vacuo, and the residue was chromatographed ( $\text{SiO}_2$ ; eluent, Hexane/ $\text{CH}_2\text{Cl}_2$ , 3: 1) to give 0.57 g of **7** (71%) as a white solid. m.p. 182~184 °C;  $^1\text{H}$  NMR (400 MHz,  $\text{CDCl}_3$ )  $\delta$ :

0.99 (s, 18H, CH<sub>3</sub>), 1.29 (s, 18H, CH<sub>3</sub>), 2.18 (m, 8H, CH<sub>2</sub>), 3.32 (d,  $J$  = 13.2 Hz, 4H, ArCH<sub>2</sub>Ar), 4.01 (m, 8H, CH<sub>2</sub>), 4.27 (d,  $J$  = 13.2 Hz, 4H, ArCH<sub>2</sub>Ar), 6.63 (d,  $J$  = 8.8 Hz, 4H, ArH), 6.84 (s, 4H, ArH), 7.06 (s, 4H, ArH), 7.49 (d,  $J$  = 8.8 Hz, 4H, ArH), 7.69 (s, 2H, –OH); <sup>13</sup>C NMR (100 MHz, CDCl<sub>3</sub>)  $\delta$ : 25.97 (CH<sub>2</sub>), 26.76 (CH<sub>2</sub>), 31.01 (CH<sub>3</sub>), 31.77 (CH<sub>3</sub>), 33.80 (C), 33.94 (C), 67.61 (CH<sub>2</sub>), 75.82 (CH<sub>2</sub>), 82.60 (C), 116.85 (CH), 125.09 (CH), 125.50 (CH), 127.64 (C), 132.59 (C), 138.16 (CH), 141.48 (C), 146.89 (C), 149.74 (C), 150.66 (C), 158.80 (C); APCI–MS  $m/z$ : 1197.0 (M<sup>+</sup>, 100).

(5) *Synthesis of the 8.* *t*-BCA **4** (320 mg, 0.49 mmol) was treated with oil-dispersed NaH (95 mg, 3.96 mmol) in DMF (20 mL) for 0.5 hr at r.t., and then **9** (1.04 g, 2.94 mmol) which was dissolved in DMF was added. The reaction mixture was stirred at 50 °C for 20 h. Excess NaH was decomposed with methanol. The mixture was diluted with water (200 mL) and extracted with CH<sub>2</sub>Cl<sub>2</sub> (3 × 20 mL). The organic layer was washed with NH<sub>4</sub>Cl (2 × 25 mL) and brine (2 × 25 mL), dried with MgSO<sub>4</sub>, and filtered. The solvent was evaporated in vacuo, and the residue was chromatographed (SiO<sub>2</sub>; eluent, Hexane/CH<sub>2</sub>Cl<sub>2</sub>, 5: 1) to give 0.73 g of **8** (85%) as a white solid. m.p. 192~195 °C; <sup>1</sup>H NMR (400 MHz, CDCl<sub>3</sub>)  $\delta$ : 1.08 (s, 36H, CH<sub>3</sub>), 1.85 (m, 8H, CH<sub>2</sub>), 2.14 (m, 8H, CH<sub>2</sub>), 3.14 (d,  $J$  = 12.4 Hz, 4H, ArCH<sub>2</sub>Ar), 3.86 (t,  $J$  = 6.4 Hz, 8H, CH<sub>2</sub>), 3.93 (t,  $J$  = 8.0 Hz, 8H, CH<sub>2</sub>), 4.38 (d,  $J$  = 12.4 Hz, 4H, ArCH<sub>2</sub>Ar), 6.55 (d,  $J$  = 8.4 Hz, 8H, ArH), 6.79 (s, 8H, ArH), 7.46 (d,  $J$  = 8.8 Hz, 8H, ArH); <sup>13</sup>C NMR (100 MHz, CDCl<sub>3</sub>)  $\delta$ : 26.06 (CH<sub>2</sub>), 26.96 (CH<sub>2</sub>), 31.09 (C), 31.43 (CH<sub>3</sub>), 33.82 (CH<sub>2</sub>), 67.86 (CH<sub>2</sub>), 74.80 (CH<sub>2</sub>), 82.68 (C), 116.69 (CH), 125.01 (CH), 133.63 (C), 138.21 (CH), 144.56 (C), 153.35 (C), 158.72 (C); APCI–MS  $m/z$ : 1745.7 (M<sup>+</sup>, 100).

(6) *Synthesis of the 1.* A 100 mL two-necked flask was charged with **6** (663 mg, 0.61 mmol), (Ph<sub>3</sub>P)<sub>2</sub>PdCl<sub>2</sub> (85 mg, 0.12 mmol), CuI (23 mg, 0.12 mmol), diisopropylamine (5 mL), and toluene (20 mL) under nitrogen. Then, to the above suspension was added a solution of **11** (127 mg, 0.85 mmol) in toluene (20 mL) over a period of 10 h at 65 °C by a machine. The reaction mixture was cooled to room temperature and filtered. The filtrate was poured into aqueous NH<sub>4</sub>Cl, and extracted with CH<sub>2</sub>Cl<sub>2</sub> (3 × 20 mL). The extract was then washed with brine, dried over MgSO<sub>4</sub>, and filtered. The solvent was evaporated in vacuo, and the residue was chromatographed (SiO<sub>2</sub>; eluent, Hexane/CH<sub>2</sub>Cl<sub>2</sub>, 3: 1) to give 224 mg of **1** (33%) as a yellow solid. m.p. 108~110 °C; <sup>1</sup>H NMR (400 MHz, CDCl<sub>3</sub>)  $\delta$ : 0.97 (m, 9H, CH<sub>3</sub>), 1.07 (s, 18H, CH<sub>3</sub>), 1.10 (s, 18H, CH<sub>3</sub>), 1.44 (m, 6H, CH<sub>2</sub>), 1.98 (m, 8H, CH<sub>2</sub>), 2.20 (m, 2H, CH<sub>2</sub>), 2.49 (s, 3H, SCH<sub>3</sub>), 3.12 (m, 4H, ArCH<sub>2</sub>Ar), 3.85 (m, 6H, CH<sub>2</sub>), 3.96 (t,  $J$  = 7.6 Hz, 2H, CH<sub>2</sub>), 4.06 (t,  $J$  = 6.0 Hz, 2H, CH<sub>2</sub>), 4.41 (d,  $J$  = 12.4 Hz, 4H, ArCH<sub>2</sub>Ar), 6.76 (s, 4H, ArH), 6.81 (s, 4H, ArH), 6.88 (d,  $J$  = 7.2 Hz, 2H, ArH), 7.20 (d,  $J$  = 8.0 Hz, 2H, ArH), 7.42 (d,  $J$  = 7.2 Hz, 2H, ArH), 7.45 (d,  $J$  = 7.2 Hz, 2H, ArH); <sup>13</sup>C NMR (100 MHz, CDCl<sub>3</sub>)  $\delta$ : 14.18 (CH<sub>3</sub>), 14.23 (CH<sub>3</sub>), 15.48 (SCH<sub>3</sub>), 19.38 (CH<sub>2</sub>), 19.42 (CH<sub>2</sub>), 26.08 (CH<sub>2</sub>), 26.88 (CH<sub>2</sub>), 31.07 (CH<sub>2</sub>), 31.11 (CH<sub>2</sub>), 31.44 (CH<sub>3</sub>), 31.48 (CH<sub>3</sub>), 32.41 (CH<sub>2</sub>), 33.78 (C), 33.82 (C), 68.02 (CH<sub>2</sub>), 74.72 (CH<sub>2</sub>), 75.10 (CH<sub>2</sub>), 75.15 (CH<sub>2</sub>), 87.78 (C≡), 89.56 (C≡), 114.49 (CH), 115.25 (C), 120.03 (C), 124.82 (CH), 124.91 (CH), 124.99 (CH), 125.98 (CH), 131.71 (CH), 132.97 (CH), 133.59 (C), 133.73 (C), 133.93 (C), 133.96 (C), 138.76 (C), 144.18 (CH), 144.21 (C), 144.39 (C), 153.62 (C), 153.79 (C), 159.15 (C); APCI–MS  $m/z$ : 1128.5 (M<sup>+</sup>+H<sub>2</sub>O, 100); IR (KBr)  $\nu$ : 3054, 2987, 2930, 2306 (C≡C), 1635, 1422, 1265, 896, 744, 705 cm<sup>-1</sup>.

(7) *Synthesis of the 2.* A 100 mL two-necked flask was charged with **7** (255 mg, 0.19 mmol), (Ph<sub>3</sub>P)<sub>2</sub>PdCl<sub>2</sub> (50 mg, 0.07 mmol), CuI (8 mg, 0.04 mmol), diisopropylamine (5 mL), and toluene (20 mL) under nitrogen. Then, to

the above suspension was added a solution of **11** (126 mg, 0.85 mmol) in toluene (20 mL) over a period of 10 h at 65 °C by a machine. The reaction mixture was cooled to room temperature and filtered. The filtrate was poured into aqueous NH<sub>4</sub>Cl, and extracted with CH<sub>2</sub>Cl<sub>2</sub> (3 × 20 mL). The extract was then washed with brine, dried over MgSO<sub>4</sub>, and filtered. The solvent was evaporated in vacuo, and the residue was chromatographed (SiO<sub>2</sub>; eluent, Hexane/EtOH, 3: 1) to give 200 mg of **2** (77%) as a yellow solid. m.p. 244~245 °C; <sup>1</sup>H NMR (400 MHz, CDCl<sub>3</sub>) δ: 0.99 (s, 18H, CH<sub>3</sub>), 1.29 (s, 18H, CH<sub>3</sub>), 2.19 (m, 8H, CH<sub>2</sub>), 2.48 (s, 6H, SCH<sub>3</sub>), 3.33 (d, *J* = 12.8 Hz, 4H, ArCH<sub>2</sub>Ar), 4.05 (s, 8H, CH<sub>2</sub>), 4.29 (d, *J* = 12.8 Hz, 4H, ArCH<sub>2</sub>Ar), 6.81 (d, *J* = 8.8 Hz, 4H, ArH), 6.83 (s, 4H, ArH), 7.06 (s, 4H, ArH), 7.15 (d, *J* = 8.4 Hz, 4H, ArH), 7.39 (d, *J* = 8.0 Hz, 4H, ArH), 7.41 (d, *J* = 7.6 Hz, 4H, ArH), 7.68 (s, 2H, –OH); <sup>13</sup>C NMR (100 MHz, CDCl<sub>3</sub>) δ: 15.40 (SCH<sub>3</sub>), 26.14 (CH<sub>2</sub>), 26.83 (CH<sub>2</sub>), 31.03 (CH<sub>3</sub>), 31.69 (CH<sub>2</sub>), 31.78 (CH<sub>3</sub>), 33.81 (C), 33.95 (C), 67.62 (CH<sub>2</sub>), 75.93 (CH<sub>2</sub>), 87.79 (C≡), 89.57 (C≡), 114.50 (CH), 115.24 (C), 119 (C), 125.09 (CH), 125.51 (CH), 125.85 (CH), 127.69 (C), 131.73 (CH), 132.62 (C), 133.02 (CH), 138.66 (C), 141.46 (C); APCI–MS *m/z*: 1237.2 (M<sup>+</sup>, 100); IR (KBr) ν: 3054, 2987, 2306 (C≡C), 1624, 1422, 1265, 1121, 896, 742, 705 cm<sup>–1</sup>.

(8) *Synthesis of the 3*. A 100 mL two-necked flask was charged with **8** (727 mg, 0.42 mmol), (Ph<sub>3</sub>P)<sub>2</sub>PdCl<sub>2</sub> (65 mg, 0.09 mmol), CuI (18 mg, 0.09 mmol), diisopropylamine (5 mL), and toluene (20 mL) under nitrogen. Then, to the above suspension was added a solution of **11** (377 mg, 2.54 mmol) in toluene (20 mL) over a period of 10 h at 65 °C by a machine. The reaction mixture was cooled to room temperature and filtered. The filtrate was poured into aqueous NH<sub>4</sub>Cl, and extracted with CH<sub>2</sub>Cl<sub>2</sub> (3 × 20 mL). The extract was then washed with brine, dried over MgSO<sub>4</sub>, and filtered. The solvent was evaporated in vacuo, and the residue was chromatographed (SiO<sub>2</sub>; eluent, Hexane/CH<sub>2</sub>Cl<sub>2</sub>, 2: 1) to give 213 mg of **3** (28%) as a yellow solid. m.p. 268–270 °C; <sup>1</sup>H NMR (400 MHz, CDCl<sub>3</sub>) δ: 1.09 (s, 36H, CH<sub>3</sub>), 1.89 (m, 8H, CH<sub>2</sub>), 2.19 (m, 8H, CH<sub>2</sub>), 2.45 (s, 12H, SCH<sub>3</sub>), 3.16 (d, *J* = 12.8 Hz, 4H, ArCH<sub>2</sub>Ar), 3.94 (m, 16H, CH<sub>2</sub>), 4.42 (d, *J* = 12.4 Hz, 4H, ArCH<sub>2</sub>Ar), 6.75 (d, *J* = 9.2 Hz, 8H, ArH), 6.80 (s, 8H, ArH), 7.11 (d, *J* = 8.8 Hz, 8H, ArH), 7.36 (dd, *J* = 1.6 Hz & 8.8 Hz, 16H, ArH); <sup>13</sup>C NMR (100 MHz, CDCl<sub>3</sub>) δ: 15.38 (SCH<sub>3</sub>), 26.23 (CH<sub>2</sub>), 27.06 (CH<sub>2</sub>), 31.18 (CH<sub>2</sub>), 31.46 (CH<sub>3</sub>), 33.85 (C), 67.90 (CH<sub>2</sub>), 74.94 (CH<sub>2</sub>), 87.92 (C≡), 89.53 (C≡), 114.42 (CH), 125.05 (CH), 125.86 (CH), 131.78 (CH), 132.21 (C), 133.09 (CH), 133.69 (C), 138.69 (C), 144.57 (C), 153.48 (C), 158.95 (C); IR (KBr) ν: 3054, 2987, 2540, 2342 (C≡C), 1593, 1421, 1265, 1121, 895, 738, 705 cm<sup>–1</sup>.

## 2. Additional Optical and Spectroscopic Data

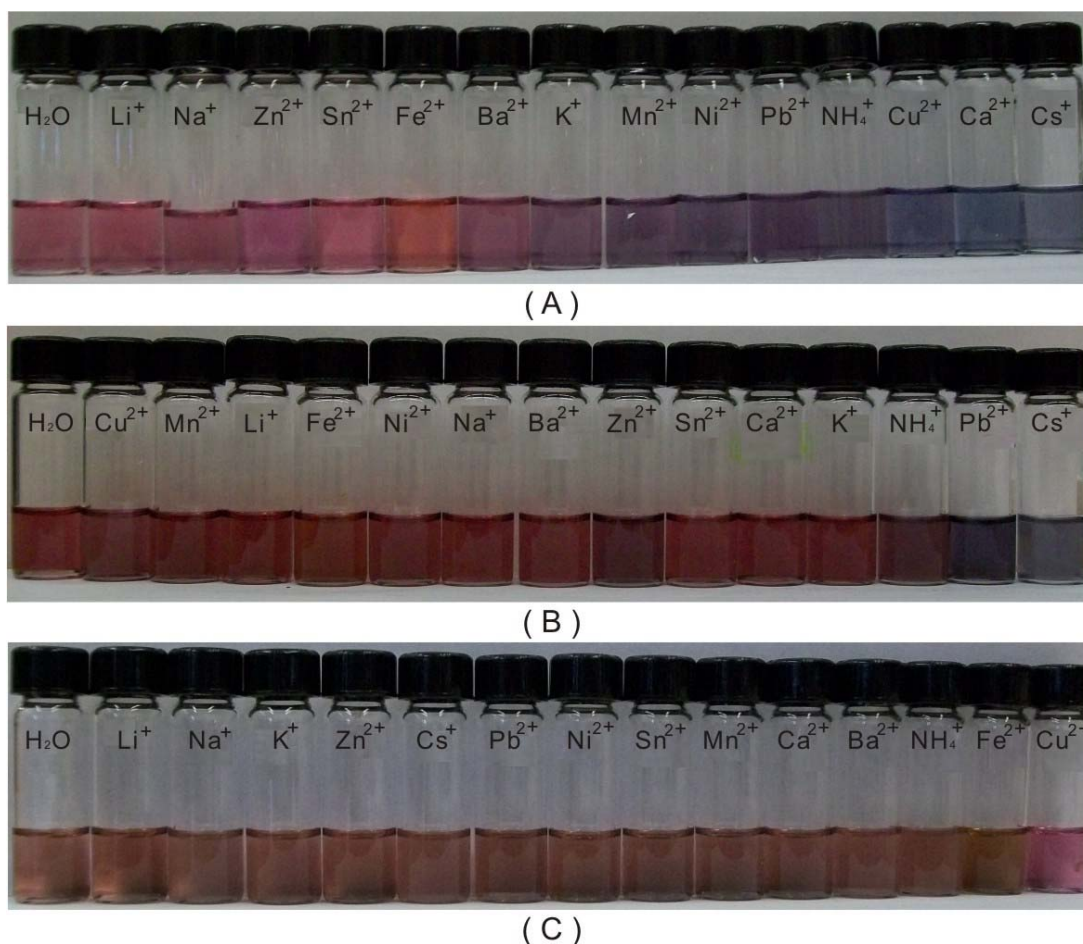

**Figure S1.** Photos showing the color changes for the methylthio-*t*-BCA molecules capped gold nanoparticles in response to the addition of different ions ( $M^{(n+)}Cl_n^-$ ). (A) Au@1; (B) Au@2; (C) Au@3.

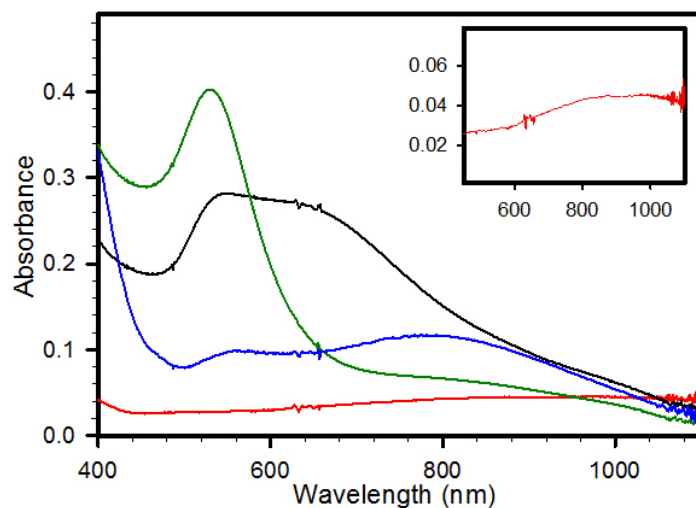

**Figure S2.** UV-visible spectra obtained from solutions of different methylthio-*t*-butylcalix[4]arenes capped gold nanoparticles in response to  $Cu^{2+}$  (1.5 mM). (THF+ $Cu^{2+}$  (red); Au@1+ $Cu^{2+}$  (black); Au@2+ $Cu^{2+}$  (green); Au@3+ $Cu^{2+}$  (blue). The insert shows the magnified view of SP band of a pure THF solvent upon addition of  $Cu^{2+}$ . This is a control experiment showing pure THF solvent upon addition of  $Cu^{2+}$  where a weak peak at 850 nm, corresponding to the absorption band of  $Cu^{2+}$ .

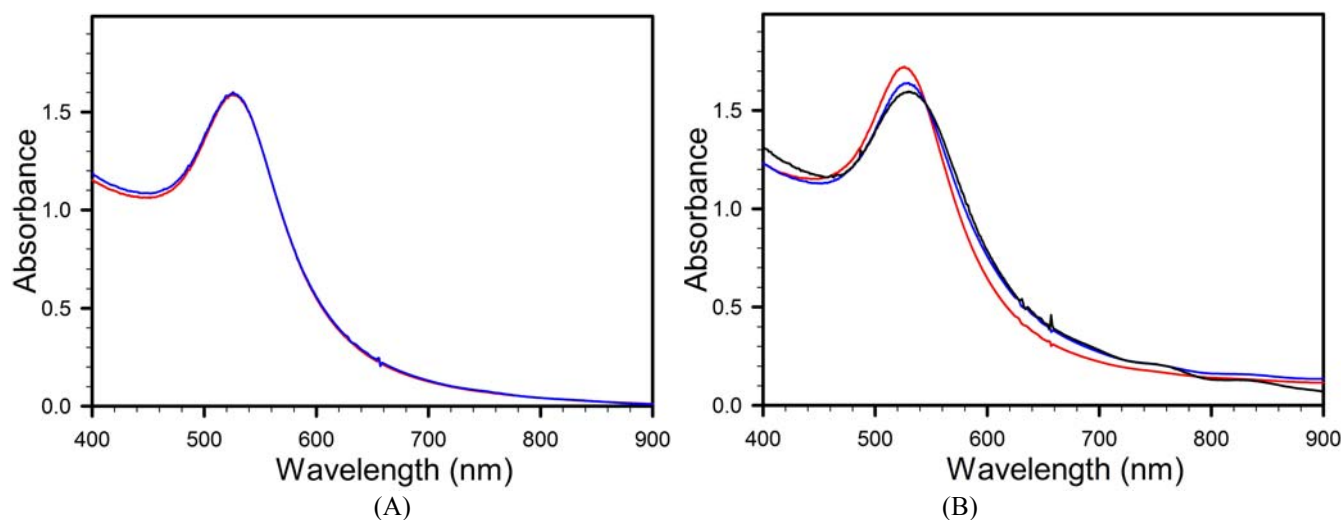

**Figure S3.** (A) UV-Visible spectra obtained from solutions of Au@1 (1.75  $\mu\text{M}$ ) responding to  $\text{Na}^+$  ( $[\text{Na}^{2+}]/[\text{Au@1}] > 1.3 \times 10^5$ , only the first (red) and the last (blue) spectra were shown); (B) UV-Visible spectra obtained from solutions of Au@1 (1.75  $\mu\text{M}$ , red) responding to  $\text{Cu}^{2+}$  ( $[\text{Cu}^{2+}]/[\text{Au@1}] = 17$ , blue), and then responding to  $\text{Na}^+$  ( $[\text{Na}^+]/[\text{Au@1}] > 1.3 \times 10^5$ , black).

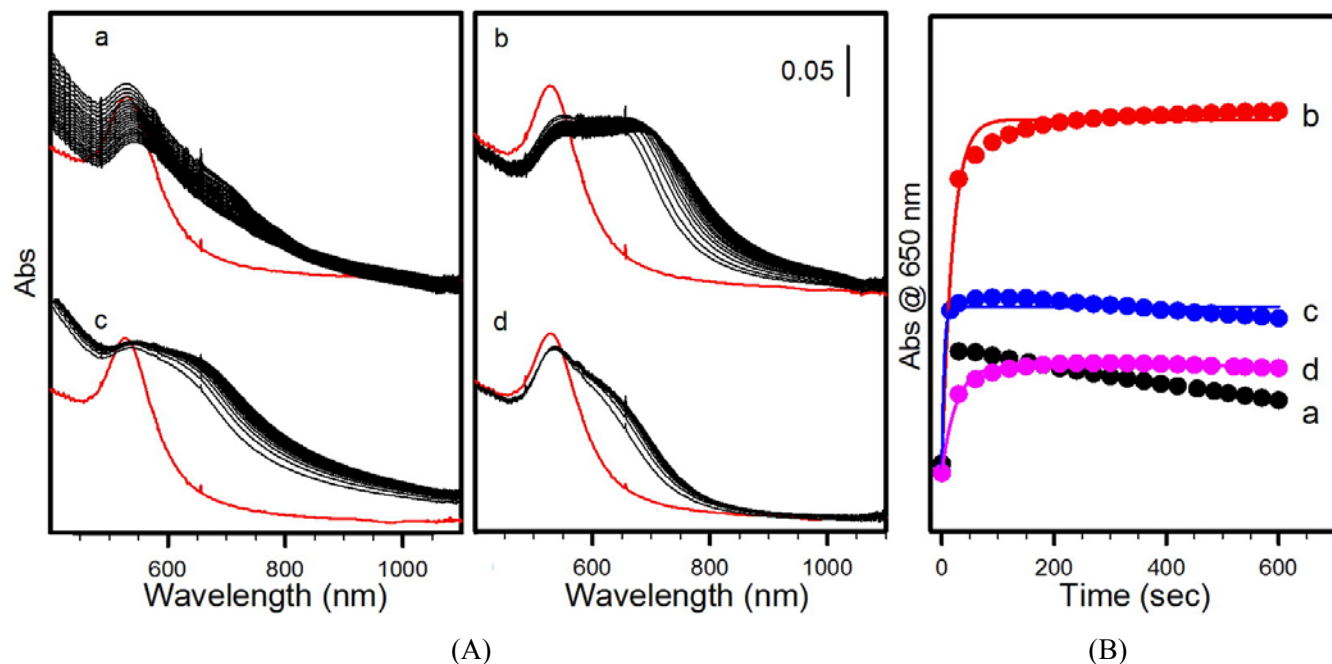

**Figure S4.** (A) UV-Visible spectra obtained from solutions of Au@1 (0.4  $\mu\text{M}$ ) responding to various concentration of  $\text{Cs}^+$  ((a)  $[\text{Cs}^+]/[\text{Au@1}] = 3750$ ; (b)  $[\text{Cs}^+]/[\text{Au@1}] = 1875$ ; (c)  $[\text{Cs}^+]/[\text{Au@1}] = 188$ ; (d)  $[\text{Cs}^+]/[\text{Au@1}] = 19$ ,  $V_{\text{THF}}: V_{\text{H}_2\text{O}} = 67: 1$ ). The reactions were followed for 1 hour (only the Au@1 (red line) spectrum was shown). (B) Kinetics for the absorbance at 650 nm for **b**-( $\bullet$ ,  $k = 2.53 \times 10^{-1} \text{ s}^{-1}$ ), **c**-( $\bullet$ ,  $k = 5.3 \times 10^{-2} \text{ s}^{-1}$ ) and **d**-( $\bullet$ ,  $k = 4.0 \times 10^{-2} \text{ s}^{-1}$ ) assemblies (lines: 1<sup>st</sup> order kinetic fits). Based on the band characteristics and the kinetics of the spectral evolution of the red-shift SP band (e.g., @ 650 nm) (Figure 6 B), apparent rate constants were derived from fitting the time dependence of the absorbance with an exponential growth ( $k$ , 1<sup>st</sup>-order). Under different concentration of  $[\text{Cs}^+]$ , the resulting rate constants displayed an order of **b** ( $2.53 \times 10^{-1} \text{ s}^{-1}$ ) > **c** ( $5.3 \times 10^{-2} \text{ s}^{-1}$ ) > **d** ( $4.0 \times 10^{-2} \text{ s}^{-1}$ ). **a** was quickly precipitated.
